# Supplementary material for: SSD1 suppresses phenotypes induced by the lack of Elongator-dependent tRNA modifications
Source: PubMed Central journal article supplement (PMC6738719; doi:10.1371/journal.pgen.1008117), 2019-08-29

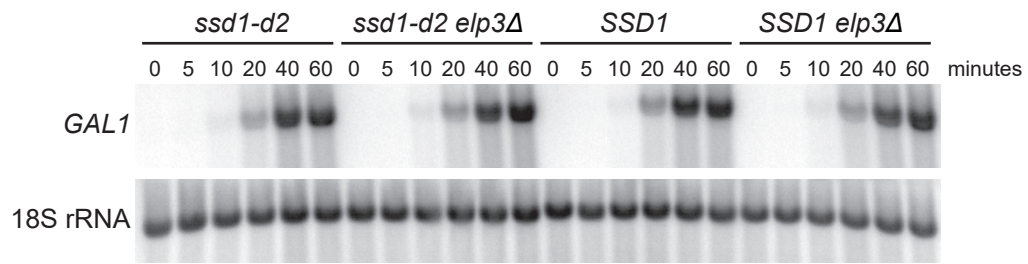

Supplement: pgen.1008117.s006.pdf [file pgen.1008117.s006.pdf]
